# Supplementary material
Source: ML conference proceedings conference paper supplement (https://proceedings.neurips.cc/paper_files/paper/2012/hash/184260348236f9554fe9375772ff966e-Abstract.html)
Supplement: Supplementary file 1 [file 184260348236f9554fe9375772ff966e-Supplemental.zip]

## 5 Appendix

### 5.1 Proof of Lemma 1

*Proof.*

$$\log \det(A + B) = \log \det(A(I + A^{-1}B)) \quad (14)$$

$$= \log \det A + \log \det(I + A^{-1}B) \quad (15)$$

$$\geq \log \det A + p \log(1 - \|A^{-1}\|_2 \|B\|_2) \quad (16)$$

$$\geq \log \det A - p \frac{\|A^{-1}\|_2 \|B\|_2}{1 - \|A^{-1}\|_2 \|B\|_2} \quad (17)$$

$$\geq \log \det A - \frac{p}{\gamma} \|A^{-1}\|_2 \|B\|_2 \quad (18)$$

$$\geq \log \det A - \frac{p}{\gamma \sigma_{\min}(A)} \|B\|_2 \quad (19)$$

$$\geq \log \det A - \frac{p}{\gamma \sigma_{\min}(A)} \|B\|_F \quad (20)$$

□
